# Supplementary material for: Prediction system for risk of allograft loss in patients receiving kidney transplants: international derivation and validation study
Source: PubMed Central journal article supplement — BMJ. 2019 Sep 17;366:l4923. doi: 10.1136/bmj.l4923 (PMC6746192; doi:10.1136/bmj.l4923), 2019-09-17
Supplement: loua047779.ww1.pdf [file loua047779.ww1.pdf]

## Supplementary material

### 1. SUPPLEMENTARY METHODS

- 1.1. **Data collection procedures**
- 1.2. **Independent validation cohorts**
- 1.3. **Prognostic parameters prospectively collected and assessed in the derivation cohort**
- 1.4. **Therapeutic protocol for interventions**
- 1.5. **Statistical analysis interpretation**
- 1.6. **Construction of the integrative score derived from the final multivariable Cox Model**
- 1.7. **TRIPOD Check list: Prediction Model Development and Validation**

### 2. SUPPLEMENTARY TABLES

**Supplementary Table A:** Details of the Clinical trials depicting the population characteristics, clinical scenarios and interventions

**Supplementary Table B:** General transplant procedures and policies and allocation systems in the participating centres

**Supplementary Table C:** Baseline characteristics of the European validation centres

**Supplementary Table D:** Baseline characteristics of the North-American validation centres

**Supplementary Table E:** Independent determinants of kidney allograft loss in the derivation cohort stratified by centre: multivariable analysis

**Supplementary Table F:** Patients characteristics according to the therapeutic intervention.

**Supplementary Table G:** iBox risk score comparison of previously published risk scores

**Supplementary Table H:** Independent determinants of kidney allograft loss in the derivation cohort using histological diagnoses: multivariable analysis

### 3. SUPPLEMENTARY FIGURES

**Supplementary Figure A:** Density of risk evaluation time points after transplantation

**Supplementary Figure B:** iBox practical application for clinicians: Ready-to-use interface for clinicians.

**Supplementary Figure C:** Effect of treatment intervention on iBox risk score.

## 1. SUPPLEMENTARY METHODS

### 1.1 Data collection procedures

All data from Paris-Necker, Paris-Saint Louis, Foch and Toulouse hospitals were extracted from the prospective Paris Transplant Group Cohort data cohort. The database networks have been approved by the National French Commission for bioinformatics data and patient liberty and codes were used to ensure strict donor and recipient anonymity and blind access. Informed consent was obtained from the participants at the time of transplantation. The data are computerised in real time and at the time of transplantation, at the time of post-transplant allograft biopsies and at each transplant anniversary and are submitted for an annual audit.

### 1.2 Independent validation cohorts

In the European validation cohort, the French data from the Lyon, and Nantes Hospitals for donors and recipients were extracted from the DIVAT cohort (official website: [www.divat.fr](http://www.divat.fr)) and from the French national agency database CRISTAL (official website: <https://www.sipg.sante.fr/portail/>). The Belgian data and data from the North-American validation cohort were collected as part of routine clinical practice and entered in centres' databases in compliance with local and national regulatory requirements. They were sent anonymised to the Paris Transplant Group.

### 1.3 Prognostic parameters prospectively collected and assessed in the derivation cohort

|                                              |                                            |
|----------------------------------------------|--------------------------------------------|
| <u>Baseline recipient's characteristics:</u> |                                            |
| 1.                                           | Recipient's age                            |
| 2.                                           | Recipient's gender                         |
| 3.                                           | Recipient's height                         |
| 4.                                           | Recipient's weight                         |
| 5.                                           | Previous transplantation                   |
| 6.                                           | Delay between dialysis and transplantation |
| 7.                                           | Cause of end stage renal disease           |
| 8.                                           | ABO blood group                            |
| 9.                                           | HLA genotype                               |
| 10.                                          | CMV serology                               |
| 11.                                          | HCV serology                               |
| 12.                                          | HBV serology                               |
| 13.                                          | HIV serology                               |
| <u>Baseline donor's characteristics:</u>     |                                            |
| 14.                                          | Donor's age                                |
| 15.                                          | Donor's gender                             |
| 16.                                          | Donor's height                             |
| 17.                                          | Donor's weight                             |
| 18.                                          | Type of donor: deceased vs living          |
| 19.                                          | Cause of donor's death                     |
| 20.                                          | Double transplantation                     |
| 21.                                          | History of hypertension                    |
| 22.                                          | History of diabetes                        |
| 23.                                          | ECD status                                 |
| 24.                                          | Serum creatinine                           |
| 25.                                          | ABO blood group                            |
| 26.                                          | HLA genotype                               |
| 27.                                          | CMV serology                               |
| 28.                                          | HCV serology                               |
| 29.                                          | HBV serology                               |

|                                                                                                      |                                                                                                 |
|------------------------------------------------------------------------------------------------------|-------------------------------------------------------------------------------------------------|
| 30.                                                                                                  | HIV serology                                                                                    |
| <u>Immunological characteristics at the time of transplantation:</u>                                 |                                                                                                 |
| 31.                                                                                                  | HLA mismatches A                                                                                |
| 32.                                                                                                  | HLA mismatches B                                                                                |
| 33.                                                                                                  | HLA mismatches Cw                                                                               |
| 34.                                                                                                  | HLA mismatches DQ                                                                               |
| 35.                                                                                                  | HLA mismatches DR                                                                               |
| 36.                                                                                                  | HLA mismatches DP                                                                               |
| 37.                                                                                                  | Anti-HLA DSA at the time of transplantation                                                     |
| 38.                                                                                                  | MFI of the anti-HLA DSA at the time of transplantation                                          |
| 39.                                                                                                  | cPRA                                                                                            |
| <u>Transplant characteristics:</u>                                                                   |                                                                                                 |
| 40.                                                                                                  | Cold ischemia time                                                                              |
| 41.                                                                                                  | Delayed graft function                                                                          |
| 42.                                                                                                  | Induction treatment with anti-thymocyte globulin                                                |
| 43.                                                                                                  | Induction treatment with basiliximab                                                            |
| 44.                                                                                                  | Steroid dose                                                                                    |
| <u>Immunological data at the time of risk assessment (Luminex SA assessment A, B, C, DP, DQ, DR)</u> |                                                                                                 |
| 45.                                                                                                  | Anti-HLA DSA                                                                                    |
| 46.                                                                                                  | MFI of immunodominant anti-HLA DSA                                                              |
| <u>Histological data according to the Banff classification:</u>                                      |                                                                                                 |
| 47.                                                                                                  | g Banff score                                                                                   |
| 48.                                                                                                  | ptc Banff score                                                                                 |
| 49.                                                                                                  | t Banff score                                                                                   |
| 50.                                                                                                  | i Banff score                                                                                   |
| 51.                                                                                                  | cg Banff score                                                                                  |
| 52.                                                                                                  | v Banff score                                                                                   |
| 53.                                                                                                  | mm Banff score                                                                                  |
| 54.                                                                                                  | ci Banff score                                                                                  |
| 55.                                                                                                  | ct Banff score                                                                                  |
| 56.                                                                                                  | IFTA Banff score                                                                                |
| 57.                                                                                                  | cv Banff score                                                                                  |
| 58.                                                                                                  | ah Banff score                                                                                  |
| 59.                                                                                                  | C4d ptc deposition                                                                              |
| 60.                                                                                                  | Recurrence of ESRD                                                                              |
| 61.                                                                                                  | Polyomavirus-associated nephropathy                                                             |
| 62.                                                                                                  | ABMR status                                                                                     |
| 63.                                                                                                  | TCMR status                                                                                     |
| 64.                                                                                                  | Borderline category                                                                             |
| <u>Follow-up variables:</u>                                                                          |                                                                                                 |
| 65.                                                                                                  | Episodes of pyelonephritis                                                                      |
| 66.                                                                                                  | Immunosuppression treatment                                                                     |
| 67.                                                                                                  | Type of treatment: calcineurin inhibitors, mycophenolate mofetil, mTOR inhibitors or belatacept |
| 68.                                                                                                  | CNI blood through level at M12 and every year                                                   |
| 69.                                                                                                  | Steroid dose at M12 and every year                                                              |
| 70.                                                                                                  | Rejection therapy (e.g., steroid, plasma exchange, intravenous immunoglobulin)                  |
| 71.                                                                                                  | CMV prophylaxis                                                                                 |
| 72.                                                                                                  | BK viral load at M12 and every year                                                             |

|     |                                          |
|-----|------------------------------------------|
| 73. | CMV viral load at M12 and every year     |
| 74. | Allograft function at M12 and every year |
| 75. | Proteinuria at M12 and every year        |
| 76. | Patient date and cause of allograft loss |
| 77. | Patient date and cause of death          |

### **Detection and Characterisation of Donor-specific Anti-HLA Antibodies**

All patients were tested for the presence of circulating anti-HLA donor-specific antibodies (DSAs) at the time of patient risk evaluation. The presence of circulating DSAs against HLA-A, HLA-B, HLA-Cw, HLA-DR, HLA-DQ and HLA-DP was retrospectively determined using single-antigen flow bead assays (One Lambda, Inc., Canoga Park, CA, USA) on a Luminex platform. Beads with a normalised mean fluorescence intensity (MFI), a measure of donor-specific antibody strength, of greater than 500 units were judged as positive as previously described. HLA typing of the transplant recipients and donors was performed using an Innolipa HLA Typing Kit (Innogenetics, Ghent, Belgium). In the validation cohorts, HLA genotyping and HLA antibody profiling were performed according to local centre practice.

### **Kidney Allograft Phenotypes at time of risk assessment**

In the derivation cohort, allograft biopsies were scored and graded from 0 to 3 according to the updated Banff criteria for allograft pathology for the following histological factors: glomerular inflammation (glomerulitis), tubular inflammation (tubulitis), interstitial inflammation, endarteritis, peritubular capillary inflammation (capillaritis), transplant glomerulopathy, interstitial fibrosis, tubular atrophy, arteriolar hyalinosis and arteriosclerosis. Additional diagnoses provided by the biopsy (e.g., the diagnoses of primary disease recurrence, BK virus nephropathy) were recorded. The biopsy sections (4 µm) were stained with periodic acid-Schiff, Masson's trichrome, and hematoxylin and eosin. C4d staining was performed via immunohistochemical analysis on paraffin sections using polyclonal human anti-C4d antibodies. Also, in the validation cohorts, the Banff criteria for the individual histological lesions were assessed in each biopsy included in the study.

## **1.4 Therapeutic protocol for interventions**

We identified patients in the derivation cohort with therapeutic interventions: antibody-mediated rejection biopsy-proven according to the Banff Classification 2015 (n=425), T-cell mediated rejection biopsy-proven according to the Banff Classification 2015 (n=305) and calcineurin inhibitor weaning for calcineurin inhibitor toxicity with belatacept (n=114). iBox evaluations were performed at the time of treatment and after treatment.

All patients with antibody-mediated rejection received standard of care treatment including antibody targeting therapies consisting of 4 courses of high-dose intravenous immune globulin (2 g/kg of body weight over 96 hours), plasma exchange (5 rounds), and anti-CD-20 rituximab (Mabthera®, Roche, Meylan, France, 375 mg per square meter of body-surface area). Patients with a diagnosis of T cell-mediated rejection received 3 methylprednisolone pulses (500 mg/day) given intravenously together with oral steroid tapering (from 1 mg/kg BW to 10 mg per day over a month period). Last group consisted in adult recipients of a renal allograft from a living or deceased donor receiving calcineurin inhibitor-based maintenance immunosuppression at a stable dose during the month immediately before treatment and stable doses of background immunosuppression (mycophenolate mofetil, mycophenolic acid, sirolimus, or azathioprine) + corticosteroids, that were diagnosed with calcineurin inhibitor toxicity based on allograft biopsy assessment and converted to Belatacept (CTLA4-Ig). Belatacept 5 mg/kg was given by intravenous infusion on days 1, 15, 29, 43, and 57, and then every 28 days thereafter. Calcineurin inhibitor dose was tapered as follows: 100% on day 1, to 40 to 60% on day 15, 20 to 30% on day 23, and none on day 29 and beyond.

## **1.5 Statistical analysis interpretation**

### **1.5.1 Continuous variables**

When used as continuous variables in the Cox model, a potential non-linear relationship between predictors and allograft loss was first investigated using restricted cubic splines modelling. Secondly, a fractional polynomial method was applied to determine the best transformation for continuous variables. For donor age, recipient age, eGFR and HLA mismatches, a linear relationship with outcome was found to be a good approximation. A logarithmic transformation was necessary for proteinuria and time post-transplant.

### **1.5.2 Discrimination**

The aim of discrimination is to distinguish between patients who experience an event and those who do not. The C-index estimates the proportion of all pairwise patient combinations from the sample data whose survival time can be ordered such that the patient with the highest predicted survival is the one who actually survived longer (discrimination). The C-index ( $0 \leq C \leq 1$ ) is the probability of concordance between predicted and observed survival, with C-index=0.5 for random predictions and C-index=1 for a perfectly discriminating model.

### **1.5.3 Calibration**

Calibration refers to the ability to provide unbiased survival predictions in groups of similar patients. It estimates how close the score-estimated risk is to the observed risk. A prediction model is considered "well calibrated" if the difference between predictions and observations in all groups of similar patients is close to 0 (perfect calibration). Any large deviation ( $p < 0.1$ ) indicates a lack of calibration.

### **1.5.4 Bootstrapping**

Bootstrapping is the preferred simulation technique that was first described by Bradley Efron. The original dataset is a random sample of patients being representative of a general population. Bootstrapping means generating a large number of datasets, each of which with the same sample size as the original one, by resampling with replacement (i.e., a previously selected patient may be selected again).

### **1.5.5 Internal validation**

Internal validation is useful to obtain an honest estimate of the model performance for patients who are similar to those in the development sample and to indicate an upper limit to the expected performance in other settings. The bootstrap approach is the preferred technique to assess internal validity. The internal validity of the final model was confirmed using a bootstrap procedure, which involved generating 1,000 datasets derived from resampling the original dataset and permitted the calculation of optimism-corrected performance estimates.

### **1.5.6 External validation**

External validation may show different results from internal validation since many aspects may be different between settings, including selection of patients, definitions of variables, and diagnostic or therapeutic procedures. The strength of the evidence for the score validity is usually considered greater with a fully external validation (e.g., other investigators and centres).

## **1.6 Construction of the integrative score derived from the final multivariable Cox model**

The construction of the score was performed with the sum of the beta derived from the final cox model for each patient. The survival probabilities, ranging from 0 to 100%, were performed using the baseline survival at 7 years and the sum of the beta.

## 1.7 TRIPOD Checklist: Prediction Model Development and Validation

| Section/Topic                |     | Checklist Item |                                                                                                                                                                                                       | Page                                 |
|------------------------------|-----|----------------|-------------------------------------------------------------------------------------------------------------------------------------------------------------------------------------------------------|--------------------------------------|
| <b>Title and abstract</b>    |     |                |                                                                                                                                                                                                       |                                      |
| Title                        | 1   | D;V            | Identify the study as developing and/or validating a multivariable prediction model, the target population, and the outcome to be predicted.                                                          | 1                                    |
| Abstract                     | 2   | D;V            | Provide a summary of objectives, study design, setting, participants, sample size, predictors, outcome, statistical analysis, results, and conclusions.                                               | 4                                    |
| <b>Introduction</b>          |     |                |                                                                                                                                                                                                       |                                      |
| Background and objectives    | 3a  | D;V            | Explain the medical context (including whether diagnostic or prognostic) and rationale for developing or validating the multivariable prediction model, including references to existing models.      | 5-6                                  |
|                              | 3b  | D;V            | Specify the objectives, including whether the study describes the development or validation of the model or both.                                                                                     | 6                                    |
| <b>Methods</b>               |     |                |                                                                                                                                                                                                       |                                      |
| Source of data               | 4a  | D;V            | Describe the study design or source of data (e.g., randomized trial, cohort, or registry data), separately for the development and validation data sets, if applicable.                               | 7                                    |
|                              | 4b  | D;V            | Specify the key study dates, including start of accrual; end of accrual; and, if applicable, end of follow-up.                                                                                        | 7-8                                  |
| Participants                 | 5a  | D;V            | Specify key elements of the study setting (e.g., primary care, secondary care, general population) including number and location of centres.                                                          | 7-8                                  |
|                              | 5b  | D;V            | Describe eligibility criteria for participants.                                                                                                                                                       | 7                                    |
|                              | 5c  | D;V            | Give details of treatments received, if relevant.                                                                                                                                                     | n/a                                  |
| Outcome                      | 6a  | D;V            | Clearly define the outcome that is predicted by the prediction model, including how and when assessed.                                                                                                | 9                                    |
|                              | 6b  | D;V            | Report any actions to blind assessment of the outcome to be predicted.                                                                                                                                | n/a                                  |
| Predictors                   | 7a  | D;V            | Clearly define all predictors used in developing the multivariable prediction model, including how and when they were measured.                                                                       | 8-9; Appendix material methods       |
|                              | 7b  | D;V            | Report any actions to blind assessment of predictors for the outcome and other predictors.                                                                                                            | n/a                                  |
| Sample size                  | 8   | D;V            | Explain how the study size was arrived at.                                                                                                                                                            | n/a                                  |
| Missing data                 | 9   | D;V            | Describe how missing data were handled (e.g., complete-case analysis, single imputation, multiple imputation) with details of any imputation method.                                                  | 9                                    |
| Statistical analysis methods | 10a | D              | Describe how predictors were handled in the analyses.                                                                                                                                                 | 10                                   |
|                              | 10b | D              | Specify type of model, all model-building procedures (including any predictor selection), and method for internal validation.                                                                         | 9-11                                 |
|                              | 10c | V              | For validation, describe how the predictions were calculated.                                                                                                                                         | 10                                   |
|                              | 10d | D;V            | Specify all measures used to assess model performance and, if relevant, to compare multiple models.                                                                                                   | 10                                   |
|                              | 10e | V              | Describe any model updating (e.g., recalibration) arising from the validation, if done.                                                                                                               | n/a                                  |
| Risk groups                  | 11  | D;V            | Provide details on how risk groups were created, if done.                                                                                                                                             | 11                                   |
| Development vs. validation   | 12  | V              | For validation, identify any differences from the development data in setting, eligibility criteria, outcome, and predictors.                                                                         | 7-8; Appendix table 2                |
| <b>Results</b>               |     |                |                                                                                                                                                                                                       |                                      |
| Participants                 | 13a | D;V            | Describe the flow of participants through the study, including the number of participants with and without the outcome and, if applicable, a summary of the follow-up time. A diagram may be helpful. | 12                                   |
|                              | 13b | D;V            | Describe the characteristics of the participants (basic demographics, clinical features, available predictors), including the number of participants with missing data for predictors and outcome.    | 12; Table 1                          |
|                              | 13c | V              | For validation, show a comparison with the development data of the distribution of important variables (demographics, predictors and outcome).                                                        | Table 1                              |
| Model development            | 14a | D              | Specify the number of participants and outcome events in each analysis.                                                                                                                               | Table 2                              |
|                              | 14b | D              | If done, report the unadjusted association between each candidate predictor and outcome.                                                                                                              | Table 2                              |
| Model specification          | 15a | D              | Present the full prediction model to allow predictions for individuals (i.e., all regression coefficients, and model intercept or baseline survival at a given time point).                           | 13; appendix material – methods p. 5 |
|                              | 15b | D              | Explain how to use the prediction model.                                                                                                                                                              | 13                                   |
| Model performance            | 16  | D;V            | Report performance measures (with CIs) for the prediction model.                                                                                                                                      | 13-14                                |
| Model-updating               | 17  | V              | If done, report the results from any model updating (i.e., model specification, model performance).                                                                                                   | n/a                                  |
| <b>Discussion</b>            |     |                |                                                                                                                                                                                                       |                                      |
| Limitations                  | 18  | D;V            | Discuss any limitations of the study (such as nonrepresentative sample, few events per predictor, missing data).                                                                                      | 19-20                                |
| Interpretation               | 19a | V              | For validation, discuss the results with reference to performance in the development data, and any other validation data.                                                                             | 17-18                                |
|                              | 19b | D;V            | Give an overall interpretation of the results, considering objectives, limitations, results from similar studies, and other relevant evidence.                                                        | 17-20                                |
| Implications                 | 20  | D;V            | Discuss the potential clinical use of the model and implications for future research.                                                                                                                 | 19-20                                |
| <b>Other information</b>     |     |                |                                                                                                                                                                                                       |                                      |
| Supplementary information    | 21  | D;V            | Provide information about the availability of supplementary resources, such as study protocol, Web calculator, and data sets.                                                                         | Supplementary appendix               |

|         |    |     |                                                                               |    |
|---------|----|-----|-------------------------------------------------------------------------------|----|
| Funding | 22 | D;V | Give the source of funding and the role of the funders for the present study. | 21 |
|---------|----|-----|-------------------------------------------------------------------------------|----|

\*Items relevant only to the development of a prediction model are denoted by D, items relating solely to a validation of a prediction model are denoted by V, and items relating to both are denoted D;V. We recommend using the TRIPOD Checklist in conjunction with the TRIPOD Explanation and Elaboration document.

## 2 SUPPLEMENTARY TABLES

**Supplementary Table A:** Details of the Clinical trials depicting the population characteristics, clinical scenarios and interventions

| STUDY       | Trial #ID                      | Design                                                                         | Clinical scenario                       | Target population                                                                                                 | (n) | Time post-transplant of iBox risk score evaluation | Follow-up time post-transplant         | iBox risk score C-Stat |
|-------------|--------------------------------|--------------------------------------------------------------------------------|-----------------------------------------|-------------------------------------------------------------------------------------------------------------------|-----|----------------------------------------------------|----------------------------------------|------------------------|
| CERTITEM*   | <b>NCT 01079143</b>            | Prospective, Randomised, open-label, multicentre trial                         | ISD minimisation                        | Recipients of renal transplants from a living or deceased donor                                                   | 194 | Median: 0.94 years<br>IQR (0.92-0.98)              | Median: 6.62 years<br>IQR (2.82-7.34)  | 0.88                   |
| RITUX ERAH† | <b>Eudra CT 2007-003213-13</b> | Prospective, Randomised, multicentre, double-blind, placebo-controlled trial   | Treatment of ABMR (preexisting DSA)     | Recipients of renal transplants from a living or deceased donor with diagnosis of acute ABMR.                     | 38  | Median: 0.74 years<br>IQR (0.53-1.10)              | Median: 6.63 years<br>IQR (4.03-7.69)  | 0.77                   |
| BORTEJECT‡  | <b>NCT 01873157</b>            | Prospective, Randomised, placebo-controlled, double-blind, single-centre trial | Treatment of ABMR ( <i>de novo</i> DSA) | Recipients of renal transplants from a living or deceased donor with post-transplant <i>de novo</i> DSA detection | 44  | Median: 6.61 years<br>IQR (4.04-15.41)             | Median: 7.75 years<br>IQR (5.32-16.41) | 0.94                   |

\*: Rostaing, L., et al. "Fibrosis progression according to epithelial-mesenchymal transition profile: a randomised trial of everolimus versus CsA." *American Journal of Transplantation* 15.5 (2015): 1303-1312; †: Sautenet, B., et al. "One-year results of the effects of rituximab on acute antibody-mediated rejection in renal transplantation: RITUX ERAH, a multicentre double-blind randomised placebo-controlled trial." *Transplantation* 100.2 (2016): 391-399; ‡: Eskandary, Farsad, et al. "A Randomised Trial of Bortezomib in Late Antibody-Mediated Kidney Transplant Rejection." *Journal of the American Society of Nephrology* (2017): ASN-2017070818.



**Supplementary Table B: General transplant procedures and policies and allocation systems in the participating centres**

| Transplant Referral Centres                                            | Allocation system                       | Deceased / living donor rate | Expanded criteria donor rate | Dual kidney transplantation program | Paired donor exchange national program | ABO incompatible program | HLA incompatible program | Standard induction therapy Protocols<br>ATG: Anti-thymocyte Globulin<br>IL2R: interleukin 2 receptor |
|------------------------------------------------------------------------|-----------------------------------------|------------------------------|------------------------------|-------------------------------------|----------------------------------------|--------------------------|--------------------------|------------------------------------------------------------------------------------------------------|
| Paris Transplant Group Saint Louis, Necker, and Foch Hospitals, France | ABM: Agence Française Biomédecine *     | 84% / 16%                    | 42%                          | <b>YES</b>                          | NO                                     | <b>YES</b>               | <b>YES</b>               | Induction rate 100% (ATG or anti-IL2R)                                                               |
| Toulouse Hospital, France                                              | ABM: Agence Française Biomédecine *     | 88% / 12%                    | 41%                          | <b>NO</b>                           | <b>NO</b>                              | <b>YES</b>               | <b>YES</b>               | Induction rate 85% (ATG or anti-IL2R)                                                                |
| Nantes Hospital, France                                                | ABM: Agence Française Biomédecine *     | 90% / 10%                    | 50%                          | <b>NO</b>                           | <b>NO</b>                              | <b>NO</b>                | <b>NO</b>                | Induction rate 80% (ATG or anti-IL2R)                                                                |
| Lyon Hospital, France                                                  | ABM: Agence Française Biomédecine *     | 93% / 7%                     | 24%                          | <b>YES</b>                          | <b>NO</b>                              | <b>YES</b>               | <b>NO</b>                | Induction rate 100% (ATG or anti-IL2R)                                                               |
| Leuven Hospital, Belgium                                               | EuroTransplant: EU allocation system †  | 94% / 6%                     | 30%                          | <b>NO</b>                           | <b>NO</b>                              | <b>YES</b>               | <b>NO</b>                | Induction rate 40% (anti-IL2R)                                                                       |
| Johns Hopkins Medical Institute, Baltimore, USA                        | UNOS United Nations for Organ Sharing ‡ | 49% / 51%                    | 13%                          | <b>NO</b>                           | <b>YES</b>                             | <b>YES</b>               | <b>YES</b>               | Induction rate 100% (ATG or anti-IL2R)                                                               |
| Virginia, USA                                                          | UNOS United Nations for Organ Sharing ‡ | 27% / 73%                    | 10%                          | <b>NO</b>                           | <b>YES</b>                             | <b>YES</b>               | <b>NO</b>                | Induction rate 100% (ATG or anti-IL2R)                                                               |
| Mayo Clinic, Rochester, USA                                            | UNOS United Nations for Organ Sharing ‡ | 22% / 78%                    | 4%                           | <b>NO</b>                           | <b>YES</b>                             | <b>YES</b>               | <b>YES</b>               | Induction rate 100% (ATG or anti-IL2R)                                                               |

\* <http://sipg.sante.fr/portail/>,  
† <http://www.eurotransplant.org/>,  
‡ <http://www.unos.org/>

**Supplementary Table C: Baseline characteristics of the European validation centres**

|                                             | n   | Nantes<br>(France)<br>(n=632) | n   | Lyon<br>(France)<br>(n=608) | n   | Leuven<br>(Belgium)<br>(n=889) |
|---------------------------------------------|-----|-------------------------------|-----|-----------------------------|-----|--------------------------------|
| <b>Recipient characteristics</b>            |     |                               |     |                             |     |                                |
| Age (years), mean (SD)                      | 632 | 50.38 (13.57)                 | 608 | 46.63 (13.28)               | 889 | 53.42<br>(13.30)               |
| Gender male, No. (%)                        | 632 | 404 (63.92)                   | 608 | 386 (63.49)                 | 889 | 543 (61.08)                    |
| ESRD causes                                 | 632 |                               | 608 |                             | 889 |                                |
| Glomerulonephritis, No. (%)                 |     | 179 (28.32)                   |     | 151 (24.84)                 |     | 254 (28.57)                    |
| Diabetes, No. (%)                           |     | 55 (8.70)                     |     | 188 (30.92)                 |     | 73 (8.21)                      |
| Vascular, No. (%)                           |     | 53 (8.39)                     |     | 49 (8.06)                   |     | 37 (4.16)                      |
| Other, No. (%)                              |     | 345 (54.59)                   |     | 220 (36.18)                 |     | 525 (59.06)                    |
| <b>Donor characteristics</b>                |     |                               |     |                             |     |                                |
| Age (years), mean (SD)                      | 632 | 53.07 (14.99)                 | 603 | 44.08 (16.55)               | 887 | 47.63<br>(14.89)               |
| Male gender, No. (%)                        | 631 | 354 (56.10)                   | 605 | 395 (65.29)                 | 888 | 476 (53.60)                    |
| Hypertension, No. (%)                       | 620 | 185 (29.84)                   | 607 | 101 (16.64)                 | 649 | 164 (25.27)                    |
| Diabetes mellitus, No. (%)                  | 481 | 36 (7.48)                     | 343 | 11 (3.21)                   | 889 | 0                              |
| Creatinine > 1.5 mg/dL, No. (%)             | 631 | 80(12.68)                     | 605 | 95 (15.70)                  | 700 | 18 (2.57)                      |
| <b>Donor type</b>                           |     |                               |     |                             |     |                                |
| Deceased donor, No. (%)                     | 632 | 576 (91.14)                   | 608 | 564 (92.76)                 | 889 | 834 (93.81)                    |
| Death from cerebrovascular disease, No. (%) | 576 | 323 (56.08)                   | 564 | 257 (45.57)                 | 834 | 413 (49.52)                    |
| Expanded criteria donor, No. (%)            | 574 | 248 (43.21)                   | 608 | 142 (23.36)                 | 828 | 238 (28.74)                    |
| <b>Transplant baseline characteristics</b>  |     |                               |     |                             |     |                                |
| Prior kidney transplant, No. (%)            | 632 | 101 (15.98)                   | 608 | 94 (15.46)                  | 889 | 127 (14.29)                    |
| Cold ischemia time (hours), mean (SD)       | 632 | 18.75 (9.39)                  | 599 | 13.68 (5.85)                | 862 | 14.37 (5.44)                   |
| Delayed graft function*, No. (%)            | 630 | 213 (33.81)                   | 608 | 102 (16.78)                 | 889 | 161 (18.11)                    |
| HLA-A/B/DR mismatch, mean (SD), number      | 632 | 3.28 (1.36)                   | 608 | 3.58 (1.35)                 | 843 | 2.75 (1.34)                    |

Abbreviations: ESRD: end-stage renal disease; HLA: human leucocyte antigen.

\* Delayed graft function was defined as the use of dialysis in the first postoperative week

**Supplementary Table D: Baseline characteristics of the North-American validation centres**

|                                                    | Johns Hopkins<br>(USA)<br>(n=580) |               | Mayo Clinic<br>(USA)<br>(n=556) |               | Virginia<br>(USA)<br>(n=292) |                  |
|----------------------------------------------------|-----------------------------------|---------------|---------------------------------|---------------|------------------------------|------------------|
|                                                    | n                                 |               | n                               |               | n                            |                  |
| <b>Recipient characteristics</b>                   |                                   |               |                                 |               |                              |                  |
| <b>Age (years), mean (SD)</b>                      | 580                               | 51.01 (14.70) | 556                             | 52.19 (13.74) | 284                          | 45.74<br>(12.88) |
| <b>Gender male, No. (%)</b>                        | 580                               | 321 (55.34)   | 556                             | 340 (61.15)   | 292                          | 169 (57.88)      |
| <b>ESRD causes</b>                                 | 580                               |               | 556                             |               | 292                          |                  |
| <b>Glomerulonephritis, No. (%)</b>                 |                                   | 147 (25.34)   |                                 | 162 (29.14)   |                              | 56 (19.18)       |
| <b>Diabetes, No. (%)</b>                           |                                   | 116 (20.00)   |                                 | 106 (19.06)   |                              | 49 (16.78)       |
| <b>Vascular, No. (%)</b>                           |                                   | 97 (16.72)    |                                 | 63 (11.33)    |                              | 89 (30.48)       |
| <b>Other, No. (%)</b>                              |                                   | 220 (37.93)   |                                 | 225 (40.47)   |                              | 98 (33.56)       |
| <b>Donor characteristics</b>                       |                                   |               |                                 |               |                              |                  |
| <b>Age (years), mean (SD)</b>                      | 580                               | 40.11 (14.78) | 556                             | 43.29 (13.00) | 284                          | 38.39<br>(17.13) |
| <b>Male gender, No. (%)</b>                        | 580                               | 279 (48.10)   | 556                             | 258 (46.40)   | 284                          | 157 (55.28)      |
| <b>Hypertension, No. (%)</b>                       | 578                               | 73 (12.63)    | 429                             | 50 (11.66)    | 280                          | 66 (23.57)       |
| <b>Diabetes mellitus, No. (%)</b>                  | 577                               | 30 (5.20)     | 419                             | 3 (0.7)       | 280                          | 14 (5.00)        |
| <b>Creatinine &gt; 1.5 mg/dL, No. (%)</b>          | 281                               | 79 (28.11)    | 510                             | 148 (29.02)   | 284                          | 57 (20.07)       |
| <b>Donor type</b>                                  |                                   |               |                                 |               |                              |                  |
| <b>Deceased donor, No. (%)</b>                     | 580                               | 283 (48.79)   | 556                             | 123 (22.12)   | 292                          | 214 (73.29)      |
| <b>Death from cerebrovascular disease, No. (%)</b> | 283                               | 88 (31.10)    | 123                             | 36 (29.27)    | 212                          | 70 (33.02)       |
| <b>Expanded criteria donor, No. (%)</b>            | 580                               | 38 (6.55)     | 556                             | 5 (0.90)      | 289                          | 29 (10.03)       |
| <b>Transplant baseline characteristics</b>         |                                   |               |                                 |               |                              |                  |
| <b>Prior kidney transplant, No. (%)</b>            | 580                               | 99 (17.07)    | 544                             | 78 (14.34)    | 284                          | 58 (20.42)       |
| <b>Cold ischemia time (hours), mean (SD)</b>       | 541                               | 10.54 (13.35) | 397                             | 4.02 (6.97)   | 274                          | 15.44<br>(10.70) |
| <b>Delayed graft function*, No. (%)</b>            | 576                               | 35 (6.08)     | 556                             | 3 (0.54)      | 292                          | 120 (41.10)      |
| <b>HLA-A/B/DR mismatch, mean (SD), number</b>      | 579                               | 3.64 (1.73)   | 556                             | 3.18 (1.86)   | 292                          | 4.03 (1.61)      |

Abbreviations: ESRD: end-stage renal disease; HLA: human leucocyte antigen.

\* Delayed graft function was defined as the use of dialysis in the first postoperative week

**Supplementary Table E:** Independent determinants of kidney allograft loss in the derivation cohort stratified by centre: multivariable analysis

|                                                  |                | Number of patients | Number of events | HR    | 95% CI        | p                 |
|--------------------------------------------------|----------------|--------------------|------------------|-------|---------------|-------------------|
| Time from transplant to evaluation (year)        |                | 3,941              | 538              | 1.074 | (1.017-1.134) | <b>0.0108</b>     |
| eGFR (mL/min/1.73 m <sup>2</sup> )               |                | 3,941              | 538              | 0.955 | (0.949-0.961) | <b>&lt;0.0001</b> |
| Proteinuria (log)                                |                | 3,941              | 538              | 1.527 | (1.414-1.648) | <b>&lt;0.0001</b> |
| Interstitial fibrosis/<br>Tubular atrophy (IFTA) | 0/1            | 3,074              | 330              | 1     | -             |                   |
|                                                  | 2              | 550                | 115              | 1.287 | (1.029-1.610) |                   |
|                                                  | 3              | 317                | 93               | 1.712 | (1.321-2.220) | <b>0.0002</b>     |
| Microcirculation<br>Inflammation (g+ptc)         | 0-2            | 3,568              | 414              | 1     | -             |                   |
|                                                  | 3-4            | 299                | 90               | 1.484 | (1.142-1.930) |                   |
|                                                  | 5-6            | 74                 | 34               | 2.017 | (1.358-2.997) | <b>0.0003</b>     |
| Interstitial inflammation<br>and tubulitis (i+t) | 0-2            | 3,559              | 447              | 1     | -             |                   |
|                                                  | ≥3             | 382                | 91               | 1.352 | (1.071-1.706) | <b>0.0111</b>     |
| Transplant<br>Glomerulopathy (cg)                | 0              | 3,684              | 445              | 1     | -             |                   |
|                                                  | ≥1             | 257                | 93               | 1.480 | (1.140-1.921) | <b>0.0032</b>     |
| Anti-HLA donor-specific<br>antibody mean         | <500           | 3,265              | 387              | 1     | -             |                   |
|                                                  | ≥500 – 3,000   | 477                | 80               | 1.280 | (0.986-1.661) |                   |
| fluorescence intensity                           | ≥3,000 – 6,000 | 80                 | 23               | 1.809 | (1.167-2.803) |                   |
|                                                  | ≥6,000         | 119                | 48               | 2.228 | (1.591-3.120) | <b>&lt;0.0001</b> |

**Supplementary Table F: Patients characteristics according to the therapeutic intervention.**

|                                                             | n   | Overall population (n=844) | n   | ABMR set (n=425) | n   | TCMR set (n=305) | n   | Minimization set (n=114) | P-Value |
|-------------------------------------------------------------|-----|----------------------------|-----|------------------|-----|------------------|-----|--------------------------|---------|
| <b>Recipient characteristics</b>                            |     |                            |     |                  |     |                  |     |                          |         |
| Age (years), mean (SD)                                      | 844 | 48.58 (14.14)              | 425 | 47.97 (14.24)    | 305 | 47.20 (13.19)    | 114 | 54.60 (14.83)            | <0.001  |
| Gender male, No. (%)                                        | 844 | 516 (61.14)                | 425 | 228 (53.65)      | 305 | 216 (70.82)      | 114 | 71 (63.16)               | <0.001  |
| ESRD causes                                                 | 844 |                            | 425 |                  | 305 |                  | 114 |                          |         |
| Glomerulonephritis, No. (%)                                 |     | 240 (28.44)                |     | 122 (28.71)      |     | 91 (29.84)       |     | 27 (23.68)               |         |
| Diabetes, No. (%)                                           |     | 82 (9.72)                  |     | 38 (8.94)        |     | 29 (9.51)        |     | 15 (13.16)               |         |
| Vascular, No. (%)                                           |     | 55 (6.52)                  |     | 26 (6.12)        |     | 23 (7.54)        |     | 6 (5.26)                 |         |
| Other, No. (%)                                              |     | 467 (55.33)                |     | 239 (56.24)      |     | 162 (53.11)      |     | 66 (57.89)               | 0.659   |
| <b>Donor characteristics</b>                                |     |                            |     |                  |     |                  |     |                          |         |
| Age (years), mean (SD)                                      | 844 | 52.17 (16.94)              | 425 | 50.86 (17.19)    | 305 | 50.10 (15.87)    | 114 | 62.61 (15.03)            | <0.001  |
| Gender male, No. (%)                                        | 844 | 445 (52.73)                | 425 | 228 (53.65)      | 305 | 160 (52.46)      | 114 | 57 (50.00)               | 0.781   |
| Deceased donor, No. (%)                                     | 844 | 719 (85.19)                | 425 | 359 (84.47)      | 305 | 260 (85.25)      | 114 | 100 (87.72)              | 0.686   |
| ECD, No. (%)                                                | 844 | 315 (37.32)                | 425 | 145 (34.12)      | 305 | 94 (30.82)       | 114 | 76 (66.67)               | <0.001  |
| <b>Transplant baseline characteristics</b>                  |     |                            |     |                  |     |                  |     |                          |         |
| Cold ischemia time (hours), mean (SD)                       | 838 | 17.05 (9.02)               | 425 | 17.39 (9.44)     | 304 | 15.95 (8.15)     | 109 | 18.80 (9.36)             | 0.010   |
| HLA A/B/DR mismatch (number), mean (SD)                     | 844 | 3.84 (1.32)                | 425 | 3.92 (1.28)      | 305 | 3.90 (1.31)      | 114 | 3.31 (1.39)              | <0.001  |
| <b>Characteristics at the time of diagnosis</b>             |     |                            |     |                  |     |                  |     |                          |         |
| Time of biopsy since Transplantation (years), mean (SD)     | 844 | 0.95 (1.51)                | 425 | 0.95 (1.40)      | 305 | 0.63 (0.85)      | 114 | 1.78 (2.58)              | <0.001  |
| eGFR (mL/min/1.73m <sup>2</sup> ), mean (SD)                | 844 | 44.36 (16.68)              | 425 | 47.07 (16.02)    | 305 | 45.58 (16.31)    | 114 | 31.01 (13.69)            | <0.001  |
| Proteinuria (g/g creatinine), mean (SD)                     | 844 | 0.43 (0.73)                | 425 | 0.44 (0.63)      | 305 | 0.42 (0.88)      | 114 | 0.38 (0.61)              | 0.681   |
| Anti-HLA DSA MFI at diagnosis, No. (%)                      | 844 |                            | 425 |                  | 305 |                  | 114 |                          |         |
| <500                                                        |     | 334 (39.57)                |     | 0                |     | 239 (78.36)      |     | 95 (83.33)               |         |
| ≥500-3000                                                   |     | 410 (48.58)                |     | 344 (80.94)      |     | 49 (16.07)       |     | 17 (14.91)               |         |
| ≥3000-6000                                                  |     | 39 (4.62)                  |     | 32 (7.53)        |     | 6 (1.97)         |     | 1 (0.88)                 |         |
| ≥ 6000                                                      |     | 61 (7.23)                  |     | 49 (11.53)       |     | 11 (3.61)        |     | 1 (0.88)                 | <0.001  |
| Delay of control biopsy after diagnosis (months), mean (SD) | 844 | 6.79 (8.29)                | 425 | 7.04 (8.35)      | 305 | 7.35 (9.32)      | 114 | 4.35 (3.14)              | 0.003   |
| Graft losses, No. (%)                                       | 844 | 174 (20.62)                | 425 | 116 (27.29)      | 305 | 53 (17.38)       | 114 | 5 (4.39)                 | <0.001  |

Abbreviations: ABMR: Antibody-mediated rejection; TCMR: T-cell mediated rejection; CI: confidence interval; DSA: donor-specific anti-HLA antibodies; ECD: Expanded Criteria Donor; eGFR: estimated Glomerular Filtration Rate; ESRD: end-stage renal disease; HLA: human leucocyte antigen; MFI: mean fluorescence intensity

**Supplementary Table G:** iBox risk score comparison of previously published risk scores. A comprehensive search strategy was conducted through several databases (PubMed, Medline, Embase, Cochrane, and Scopus) without date restrictions for publications up to July 25, 2018 for allograft survival scoring systems among kidney transplant recipients. We used the search terms “kidney transplantation”, “allograft survival” and “prognostic score”. Out of 460 articles identified, 11 were related to long-term allograft survival, 5 were externally validated and only 2 comprised immunological parameters. They are presented in the table and compared with the iBox risk prediction score. The two studies identified: i) were not derived from patient cohorts with systematic monitoring and specific design towards risk stratification; ii) did not integrate a large spectrum of potential prognostic factors, iii) were not validated in multiple large cohorts worldwide with different transplant allocation systems and management practices, iv) were not validated in randomised controlled therapeutic clinical trials (RCTs).

| STUDY                       | Trial Registration /protocol    | Study Design              | Population            | Number of Centres involved | External Validation cohort | Time of risk evaluation                                  | Follow-up time post-transplant       | Validation in therapeutic randomised controlled clinical trials (RCT) | Candidate Predictors Evaluated | Data set qualification (data quality) | Allograft phenotypes at the time of risk assessment | CSTAT validation in the iBox cohort | Individual risk prediction tool and interfacing for patients and clinicians         |
|-----------------------------|---------------------------------|---------------------------|-----------------------|----------------------------|----------------------------|----------------------------------------------------------|--------------------------------------|-----------------------------------------------------------------------|--------------------------------|---------------------------------------|-----------------------------------------------------|-------------------------------------|-------------------------------------------------------------------------------------|
| Gonzales et al <sup>†</sup> | None                            | Retrospective             | n=556 (1999 – 2008)   | 1                          | No                         | Fixed at 1 year after transplant                         | Median: not applicable               | No                                                                    | 17                             | Not audited                           | Yes (Banff international classification)            | 0.69 <sup>§</sup>                   | No                                                                                  |
| Premaud et al <sup>†</sup>  | None                            | Retrospective             | n=664 (1984 – 2011)   | 3                          | Yes n=896 France only      | Fixed at 1 year after transplant +2 adjustable variables | Median: 6.4 years                    | No                                                                    | 12                             | Not audited                           | No                                                  | 0.67 <sup>  </sup>                  | No                                                                                  |
| iBox Risk score trial       | Clinical trial.gov #NCT03474003 | Prospective observational | n=4,000 (2000 – 2014) | 10                         | Yes n=3,557 Europe and US  | Time adjusted <sup>‡</sup>                               | Median: 7.65 years (IQR: 5.20-10.30) | Yes 3 RCT (NCT01079143, EudrCT 2007-003213-13 and NCT01873157)        | 33                             | Annual audit                          | Yes (Banff international classification)            | -                                   | iBox risk prediction score individual calculation tools for clinicians and patients |

\* Gonzales MM, Bentall A, Kremers WK, Stegall MD, Borrows R. Predicting Individual Renal Allograft Outcomes Using Risk Models with 1-Year Surveillance Biopsy and Alloantibody Data. J Am Soc Nephrol. 2016;27(10):3165-74, † Premaud A, Filloux M, Gatault P, Thierry A, Buchler M, Munteanu E, et al. An adjustable predictive score of graft survival in kidney transplant patients and the levels of risk linked to de novo donor-specific anti-HLA antibodies. PLoS one. 2017;12(7):e0180236, ‡ see **Appendix Figure 1** for the distribution of iBox time post-transplant risk evaluation, **Table 2B** for the inclusion of “time of risk evaluation post-transplant” in the final model, and **Appendix Figure 3** showing examples of time updated iBox risk evaluation in patients (Patient **#3** and **#4**)

§ **Performance in the iBox cohort of the Mayo Histology-based model (NBMM) published by Gonzales et al.** This risk score is applied in a retrospective cohort including immunological and histological parameters (7 prognostic variables assessed at 1-year post transplant: eGFR (mL/min/1.73m<sup>2</sup>), proteinuria (estimated with urinary albumin-to-creatinine ratio UACR, g/L), acute rejection, race, recipient age, g Banff score and ci Banff score). The C-stat of the final model= 0.90. This score was assessed in patients who received a solitary kidney transplant between 1999 and 2008. Out of the iBox derivation cohort, 3,569 patients fitted the inclusion & exclusion criteria (231 patients excluded because of no information on albuminuria for NBMM calculation).

- Calculation of the NBMM score in the IBox cohort.

Authors based NBMM score on survival Cox models (univariate and multivariable analyses). They provided in the article the weighted coefficients for the 7 variables associated with death-censored transplant failure and the transformation needed for each variable.

The formula applied in the iBox cohort was therefore the following one:

$$\text{NBMM}_{\text{iBox cohort}} = \beta_{\text{UACR}} * (\log_{10}(\text{UACR}-46)) + \beta_{\text{eGFR}} * ((\text{eGFR}-47)/10) + \beta_{\text{eGFR}^2} * ((\text{eGFR}-47)/10)^2 + \beta_{\text{Rejection}} * \text{Rejection} + \beta_{\text{Black ethnicity}} * \text{Black ethnicity} + \beta_{\text{Recipient Age}} * ((\text{Recipient age}-46)/10) + \beta_{\text{UACR with rejection interaction}} * (\log_{10}(\text{UACR}-46) - 0.46 \text{ for rejection}) + \beta_{\text{g score}} * \text{g} + \beta_{\text{ci score}} * \text{ci}$$

With  $\beta$ s representing the weighted coefficients.

We finally calculated the NBMM score in the iBox cohort and determined the C stat of model= 0.69.

|| **Performance in the iBox cohort of the AdGFS score published by Premaud et al.** The AdGFS includes 7 prognostic variables: i) 5 assessed at 1-year post transplant: serum creatinine ( $\mu\text{M}$ ), proteinuria (g/L), creatinine cluster, donor age and pretransplant sensitization. ii) 2 adjustable variables: de novo anti-HLA DSA and acute rejection episode (C-stat of the final model=0.83). This score was assessed only in patients without DSA at the time of transplant and who exclusively received kidneys from deceased donors. The patients were transplanted between 1984 and 2011.

Population of IBox reference set fitting the inclusion exclusion criteria of AdGFS score: n= 2,855 (All with available data for AdGFS calculation).

- Building of the creatinine cluster in the iBox cohort

We applied the creatinine clusters defined in the AdGFS creation process by calculating their centres in the specified timepoints (M1, M3, M6, Y1) and assessing in the IBox cohort the clusters of assignment based on k-means analysis.

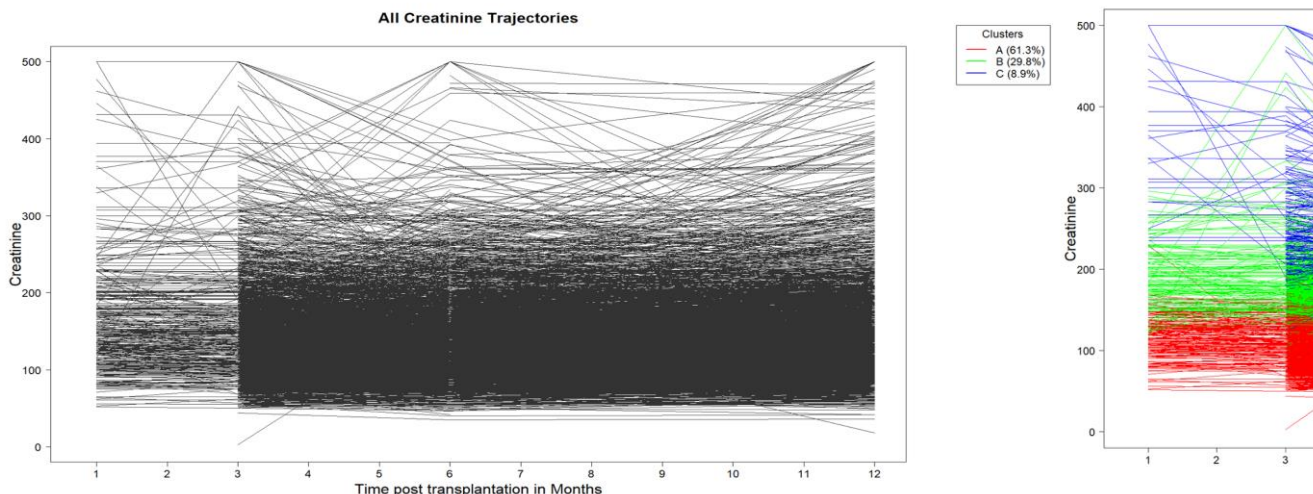

- Calculation of the AdGFS score in the IBox cohort.

We used the scoring system defined by the authors to calculate the AdGFS score in the IBox cohort.

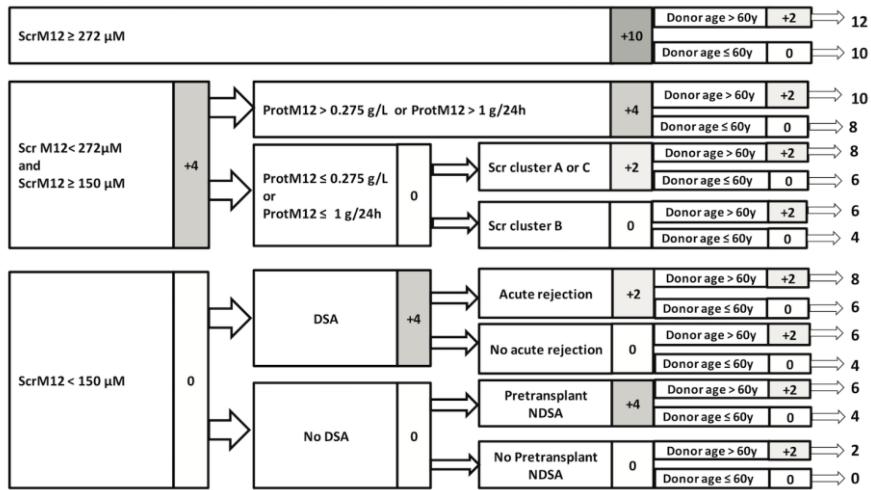

- We finally calculated the AdGFS score in the IBox cohort: C stat of the model= 0.71.



**Supplementary Table H:** Independent determinants of kidney allograft loss in the derivation cohort using histological diagnoses instead of Banff international classification lesions grading system: multivariable analysis

|                                                                     |                       | Number<br>of<br>patients | Number<br>of<br>events | HR    | 95% CI         | p                 |
|---------------------------------------------------------------------|-----------------------|--------------------------|------------------------|-------|----------------|-------------------|
| <b>Time from transplant to evaluation (year)</b>                    |                       | 3,997                    | 548                    | 1.097 | (1.043-1.153)  | <b>0.0003</b>     |
| <b>eGFR (mL/min/1.73 m<sup>2</sup>)</b>                             |                       | 3,997                    | 548                    | 0.955 | (0.949-0.961)  | <b>&lt;0.0001</b> |
| <b>Proteinuria (log)</b>                                            |                       | 3,997                    | 548                    | 1.552 | (1.443-1.670)  | <b>&lt;0.0001</b> |
| <b>Antibody-mediated rejection</b>                                  | <b>No</b>             | 3,398                    | 368                    | 1     | -              |                   |
|                                                                     | <b>Yes</b>            | 599                      | 180                    | 1.811 | (1.475-2.223)  | <b>&lt;0.0001</b> |
| <b>T-cell mediated rejection</b>                                    | <b>No</b>             | 3,810                    | 502                    | 1     | -              |                   |
|                                                                     | <b>Yes</b>            | 187                      | 46                     | 1.369 | (1.007-1.861)  | <b>0.0453</b>     |
| <b>Nephropathy Recurrence</b>                                       | <b>No</b>             | 3,867                    | 510                    | 1     | -              |                   |
|                                                                     | <b>Yes</b>            | 130                      | 38                     | 1.680 | (1.199-2.355)  | <b>0.0026</b>     |
| <b>BK virus associated nephropathy</b>                              | <b>No</b>             | 3,900                    | 517                    | 1     |                |                   |
|                                                                     | <b>Yes</b>            | 97                       | 31                     | 1.450 | (1.000 -2.107) | <b>0.0500</b>     |
| <b>Anti-HLA donor-specific antibody mean fluorescence intensity</b> | <b>&lt;500</b>        | 3,309                    | 393                    | 1     | -              |                   |
|                                                                     | <b>≥500 – 3,000</b>   | 483                      | 82                     | 1.220 | (0.946-1.572)  |                   |
|                                                                     | <b>≥3,000 – 6,000</b> | 82                       | 24                     | 1.527 | (0.993-2.348)  |                   |
|                                                                     | <b>≥6,000</b>         | 123                      | 49                     | 1.985 | (1.432-2.753)  | <b>0.0003</b>     |

### 3 SUPPLEMENTARY FIGURES

**Supplementary Figure A:** Density of risk evaluation time points after transplantation

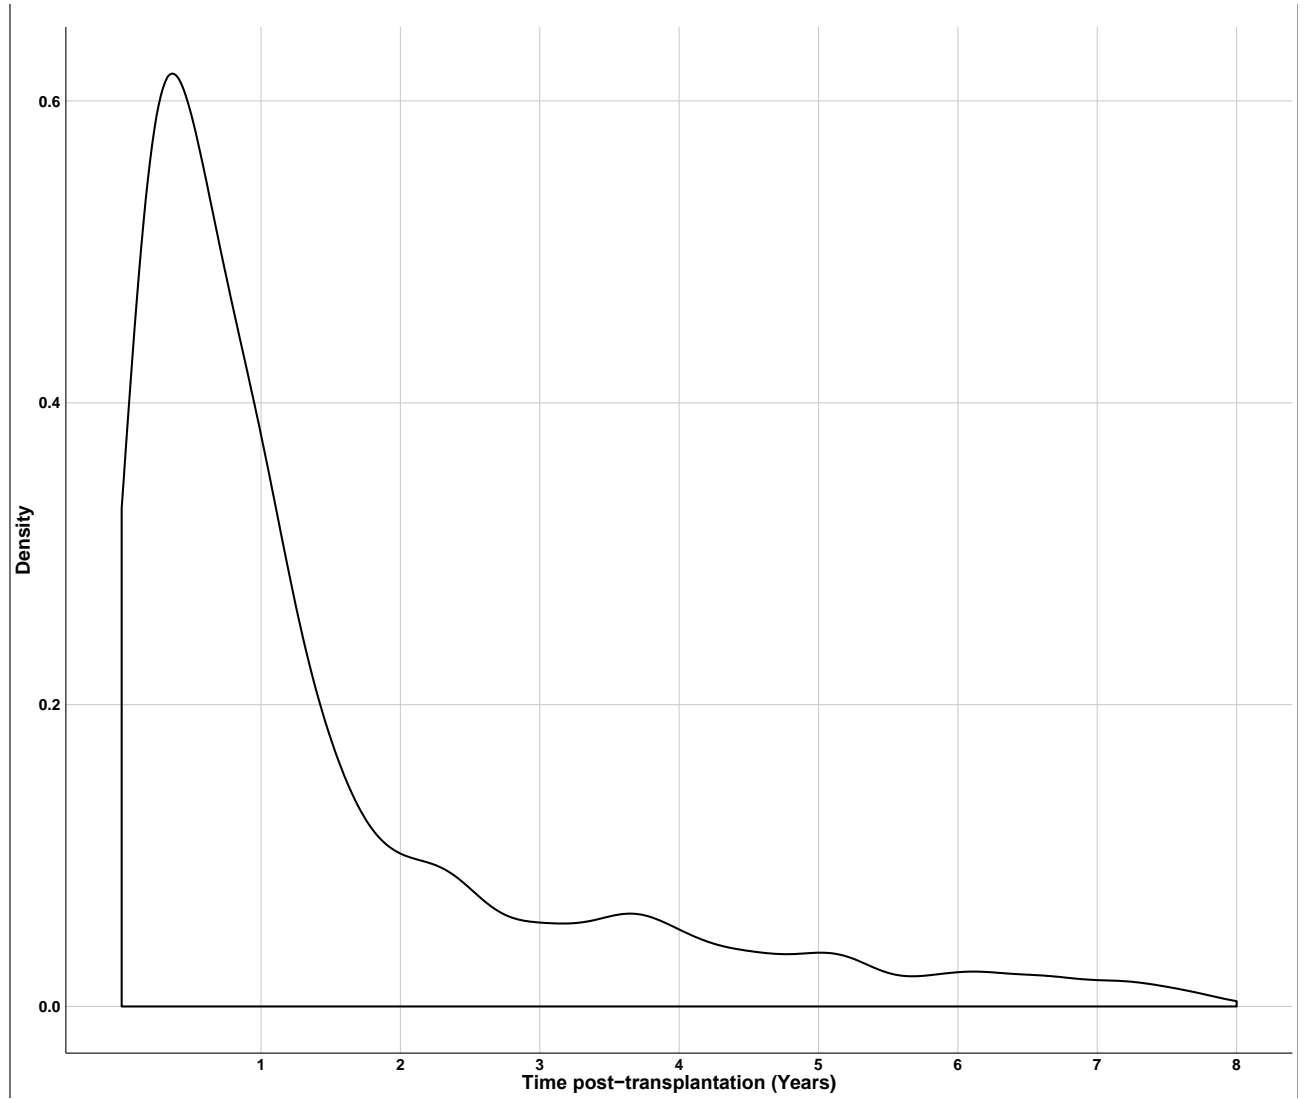

**Supplementary Figure B: iBox practical application for clinicians: Ready-to-use interface for clinicians.**

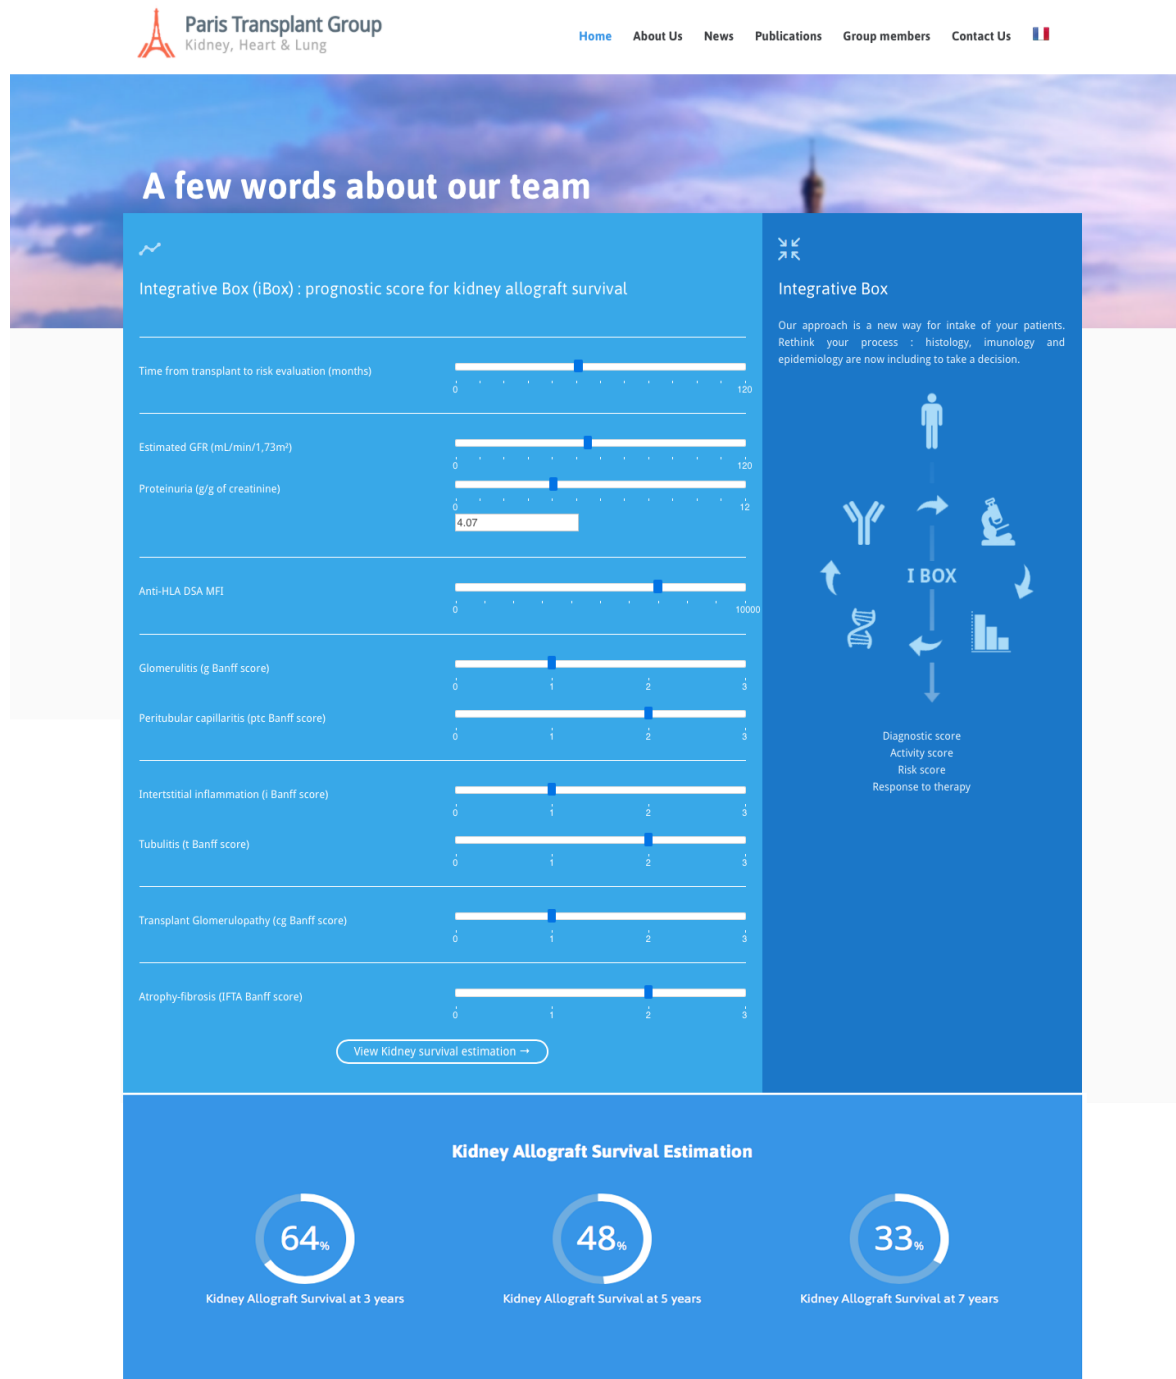

**Supplementary Figure C: Effect of treatment intervention on iBox risk score.** This analysis shows the iBox risk score assessed at the time of therapeutic intervention and after therapeutic intervention in the 3 clinical scenarios including antibody-mediated rejection, T-cell-mediated rejection and calcineurin inhibitor minimization. Blue lines correspond to a decrease in iBox risk score after treatment. Red curves correspond to an increase in iBox risk score after treatment. The iBox prediction capability post-treatment was accurate in these 3 therapeutic scenarios (C-index 0.81; 95% bootstrap percentile CIs=0.77 to 0.85). The calibration plot showed a good agreement between the iBox prediction model after therapeutic intervention and the actual observation of kidney allograft loss (calibration intercept at 7-year: 0.0121 ; calibration slope at 7-year: 0.971, 95%CI [0.719 to 1.224]).

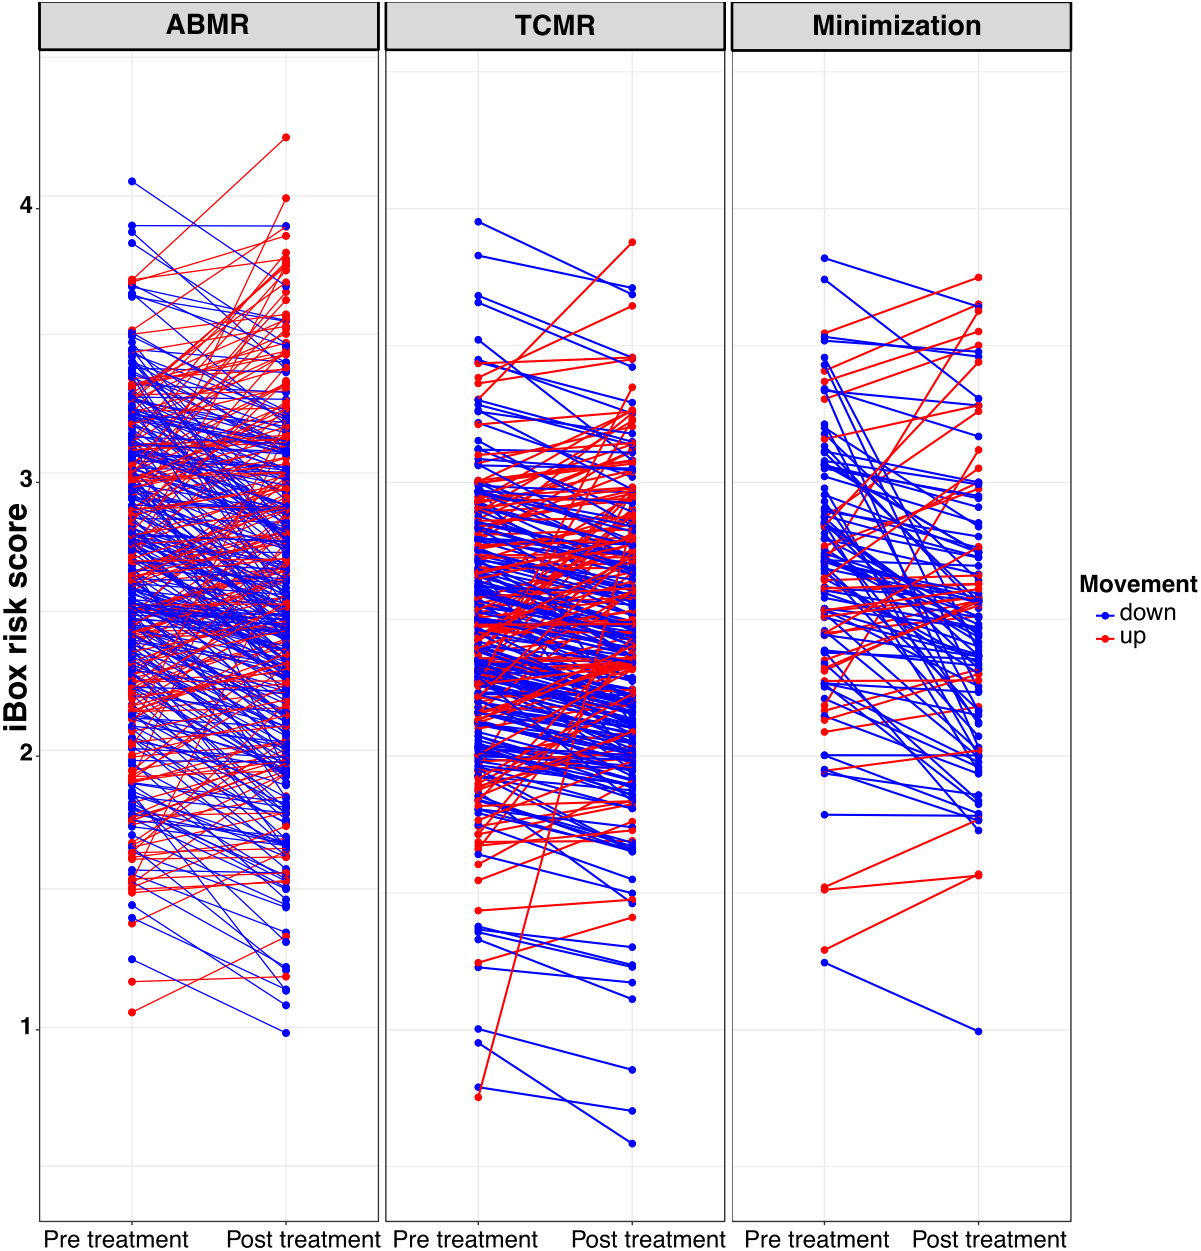

Abbreviations: ABMR, antibody-mediated rejection; TCMR, T Cell mediated rejection.
